# Supplementary material for: cNTnC and fYTnC2, Genetically Encoded Green Calcium Indicators Based on Troponin C from Fast Animals
Source: MDPI journal article supplement (doi:10.3390/ijms232314614), 2022-11-23
Supplement: s1 [file s1]

# **cNTnC and fYTnC2, Genetically Encoded Green Calcium Indicators based on Troponin C from Fast Animals**

Oksana M. Subach, Anna V. Vlaskina, Yuliya K. Agapova, Dmitriy A. Korzhenevskiy, Alena Y. Nikolaeva, Anna M. Varizhuk, Maksim F. Subach, Maxim V. Patrushev, Kiryl D. Piatkevich, Konstantin M. Boyko, and Fedor V. Subach

**Supplementary Tables and Figures.**

**Table S1.**

**Table S2.**

**Table S3.**

**Figure S1.**

**Figure S2.**

**Figure S3.**

**Figure S4.**

**Figure S5.**

**Figure S6.**

**Figure S7.**

**Figure S8.**

**Figure S9.**

**Figure S10.**

**Figure S11.**

**Figure S12.**

**Supplementary Methods.**

**Table S1.** Data collection and refinement statistics. \* Highest resolution range is shown in parentheses.

|                                         |                                  |
|-----------------------------------------|----------------------------------|
| PDB ID                                  | 5MWC                             |
| <b>Data collection</b>                  |                                  |
| Diffraction source                      | ESRF (ID30A-3)                   |
| Detector                                | Eiger 4M                         |
| Wavelength (Å)                          | 0.9677                           |
| Crystal-to-detector distance (mm)       | 170                              |
| Rotation range per image (°)            | 0.15                             |
| Total rotation range (°)                | 120                              |
| Space group                             | P4 <sub>1</sub> 2 <sub>1</sub> 2 |
| Cell size                               |                                  |
| <i>a</i> , <i>b</i> , <i>c</i> (Å)      | 82.10, 82.10, 157.47             |
| $\alpha$ , $\beta$ , $\gamma$ (°)       | 90, 90, 90                       |
| Resolution (Å)                          | 46.73-2.45 (2.50-2.45)*          |
| R <sub>merge</sub> (%)                  | 6.2 (97.3)                       |
| <I>/< $\sigma$ (I)>                     | 23.9 (2.3)                       |
| Occupancy                               | 99.7 (100)                       |
| Redundancy                              | 8.9 (9.4)                        |
| CC <sub>1/2</sub>                       | 99.9 (73.3)                      |
| <b>Refinement</b>                       |                                  |
| Reflections used in refinement          | 19409                            |
| R <sub>work</sub> / R <sub>free</sub> . | 23.8 / 31.0                      |
| Number of non-hydrogen atoms            |                                  |
| Protein                                 | 4073                             |
| Ligands/ions                            | 36                               |
| Solvent                                 | 46                               |
| Average B-factor                        | 63.2                             |
| Protein                                 | 63.6                             |
| Ligands/ions                            | 44.1                             |
| Solvent                                 | 46.3                             |
| R.m.s deviations                        |                                  |
| Bond length (Å)                         | 0.01                             |
| Angles (°)                              | 1.86                             |
| Ramachandran plot                       |                                  |
| Most favored (%)                        | 95.9                             |
| Allowed (%)                             | 2.9                              |
| Outliers (%)                            | 1.2                              |
| MolProbity score                        | 2.38                             |

**Table S2.** *In vitro* properties of fYTnC2 compared to YTnC. <sup>a</sup> Data from [1]. Data marked with asterisk (\*) were determined in this paper. <sup>b</sup> Quantum yields (QYs) were determined at pH 7.20. EGFP (QY=0.60 [2]) was used as the reference standard. <sup>c</sup> The extinction coefficients ( $\epsilon$ ) were determined by alkaline denaturation. <sup>d</sup> Brightness was calculated as a product of the quantum yield and extinction coefficient and normalized to the brightness of EGFP, which has an extinction coefficient of 56,000 M<sup>-1</sup>·cm<sup>-1</sup> and a quantum yield of 0.6 [2]. <sup>e</sup> The Hill coefficient is shown in brackets. <sup>f</sup> EGFP had a maturation half-time of 14 min. <sup>g</sup> Half-time to bleaching up to 50%. One-photon photobleaching was performed under a mercury lamp with drops in oil. Standard deviations are shown. EGFP had a photobleaching half-time of 305 ± 38 s.

| Properties                                          |                       |                       | Proteins                 |                          |                       |             |
|-----------------------------------------------------|-----------------------|-----------------------|--------------------------|--------------------------|-----------------------|-------------|
|                                                     |                       |                       | fYTnC2                   |                          | YTnC <sup>a</sup>     |             |
|                                                     |                       |                       | apo                      | sat                      | apo                   | sat         |
| Absorption maximum (nm)                             |                       |                       | 414                      | 494 (406)                | 413                   | 495 (405)   |
| Excitation maximum (nm)                             |                       |                       | 416 (500)                | 498 (418)                | 412, 501              | 502 (413)   |
| Emission maximum (nm)                               |                       |                       | 516                      | 518                      | 514                   | 516 (516)   |
| Quantum yield <sup>b</sup>                          |                       |                       | 0.08±0.01<br>(0.09±0.02) | 0.69±0.01<br>(0.24±0.02) | 0.012                 | 0.19 (0.03) |
| ε (mM <sup>-1</sup> cm <sup>-1</sup> ) <sup>c</sup> |                       |                       | 98.1±9.4                 | 46.6±2.8<br>(39.5±2.4)   | 28±2                  | 29±3 (20±2) |
| Brightness vs EGFP (%) <sup>d</sup>                 |                       |                       | 23                       | 96 (28)                  | 1                     | 17 (2)      |
| ΔF/F                                                | Purified protein      | 0 mM Mg <sup>2+</sup> | 18±1                     |                          | 10.6±0.4              |             |
|                                                     |                       | 1 mM Mg <sup>2+</sup> | 17±1                     |                          | 2.9±0.2               |             |
|                                                     | HeLa cells            |                       | 4.0±1.5                  |                          | 2.0±0.4               |             |
| pKa                                                 |                       |                       | 9.1±0.1                  | 6.4±0.1                  | 5.2±0.1, 8.2±0.1      | 6.3±0.1     |
| K <sub>d</sub><br>(nM) <sup>e</sup>                 | 0 mM Mg <sup>2+</sup> |                       | 477±14<br>[n=2.6±0.2]    |                          | 223±10<br>[n=1.4±0.1] |             |
|                                                     | 1 mM Mg <sup>2+</sup> |                       | 709±38<br>[n=2.0±0.2]    |                          | 410±19<br>[n=1.7±0.2] |             |
| Maturation half-time (min) <sup>f</sup>             |                       |                       | 4.6                      |                          | 16                    |             |
| Photobleaching half-time (s) <sup>g</sup>           |                       |                       | 194±57                   |                          | 193±36*               |             |

**Table S3.** List of primers.

| Primer                     | Primer sequence (5'-3')                      | Comment                                                                      |
|----------------------------|----------------------------------------------|------------------------------------------------------------------------------|
| <b>Neon-BglII-2</b>        | gacAGATCTATGGTGAGCAAGGGCGAG                  | Use for mutagenesis of NTnC-derived mutants                                  |
| <b>Neon-EcoRI-r2-r</b>     | tcgaattcttactgtacagctcgtccatg                |                                                                              |
| <b>Fw-LSSmOrange-BglII</b> | GTACGGCTCCAGGGCCTTCATCAAGC<br>ACCCCGCCGATATC | Use for mutagenesis of YTnC2-derived mutants                                 |
| <b>Rv-GFP-EcoRI</b>        | GATATCGGCGGGGTGCTTGATGAAGG<br>CCCTGGAGCCGTAC |                                                                              |
| <b>Fw-M146NNS</b>          | GATGGCCCTGCGCCTGAAGGACGGC<br>GGCCGCTACCTGGC  | Use for mutagenesis of NTnC                                                  |
| <b>Rv-M146NNS</b>          | GCCAGGTAGCGGCCGCGTCCTTCAG<br>GCGCAGGGCCATC   |                                                                              |
| <b>Rv-C224NNS</b>          | GGCGGCCGCTACCTGGCAGACGTCA<br>GGACCACCTACAAG  |                                                                              |
| <b>Fw-L240NNS</b>          | CTTGTAGGTGGTCCTGACGTCTGCCA<br>GGTAGCGGGCCGCC |                                                                              |
| <b>YTnC-NES3-r</b>         | CAAGGCCAAGAAGCCCGTGCAGATG<br>CCCGGCGCCTACAAC | Use for cloning of NTnC- and YTnC2-derived mutants into pAAV-CAG-NES plasmid |

|        |              |         |           |         |            |            |          |            |
|--------|--------------|---------|-----------|---------|------------|------------|----------|------------|
|        | 1            | 10      | 20        | 30      | 40         | 50         | 60       |            |
| NTnC   | MVSKGEEDN    | MASLPAT | HELHIFG   | SINGVDF | DMVGQGS    | GNPNVGYEEL | NLKSTKG  | DLQFSP     |
| NTnC2  | MVSKGEEDN    | MASLPAT | HELHIFG   | SINGVDF | DMVGQGS    | GNPNVGYEEL | NLKSTKG  | DLQFSP     |
| iNTnC2 | MVSKGEEDN    | MASLPAT | HELHIFG   | SINGADF | DMVGQGS    | GNPNVGYEEL | NLKSTKG  | DLQFSP     |
|        | 70           | 80      | 90        | 100     | 110        | 120        |          |            |
|        | ***          |         |           |         |            |            |          |            |
| NTnC   | WILVPHIGYGFH | QYLPYP  | PDGMS-P   | FQAAMVD | GSGYQVHRTV | QFEDGASL   | TVNRYRYT | YEGSH      |
| NTnC2  | WILVPHIGYGFH | QYLPYP  | PDGMS-P   | FQAAMVD | GSGYQVHRTV | QFEDGASL   | TVNRYRYT | YEGSH      |
| iNTnC2 | WILVPHIGYGFH | QYLPYP  | PDGMS-P   | FQAAMVD | GSGYQVHRTV | QFEDGASL   | TVNRYRYT | YEGSH      |
|        | 130          | 140     | 150       | 160     | 170        | 180        |          |            |
| NTnC   | IKGEAQVKGTG  | FPADGPM | ANSLT-AM  | VPSEEE  | LSECFRTF   | DKDGDGF    | IDREEFG  | GIIIRLT    |
| NTnC2  | IKGEAQVKGTG  | FPADGPM | ANSLT-AR  | VPSEEE  | LSECFRTF   | DKDGDGF    | IDREEFG  | GIIIRLA    |
| iNTnC2 | IKGEAQVKGTG  | FPADGPM | ANSLT-AF  | APSEEE  | LSECFRTF   | DKDGDGF    | IDREEFG  | GIIIRLT    |
|        | 190          | 200     | 210       | 220     | 230        | 240        |          |            |
| NTnC   | GEQLTDEDPDE  | IFGDS   | DTDKNGRID | FDEF    | FLKMVENVQ  | LSMADWCR   | SKMACP   | -NDKTLISTL |
| NTnC2  | GEQLTDEDPDE  | IFGDS   | DTDKNGRID | FDEF    | FLKMVENVQ  | LSMADWCR   | SKMACP   | -NDKTLISTD |
| iNTnC2 | GEQLTDEDPDE  | IFGDS   | DTDKNGRID | FDEF    | FLKMVENVQ  | LSVADWCR   | SKMACP   | -NDKTLISTI |
|        | 250          | 260     | 270       | 280     | 290        | 300        |          |            |
| NTnC   | KWSYTTGNGK   | RYSRTA  | RTTYTF    | AKPMAAN | YLKNQP     | -MYVFRKTE  | LKHSKTE  | MDFKEWQKAF |
| NTnC2  | KWSYTTGNGK   | RYSRTA  | RTTYTF    | AKPMAAN | YLKNQP     | -MYVFRKTE  | LKHSKTE  | MDFKEWQKAF |
| iNTnC2 | KWSYTTGNGK   | RYSRTA  | RTTYTF    | AKPMAAN | YLKNQP     | -MYVFRKTE  | LKHSKTE  | MDFKEWQKAF |
|        | 310          |         |           |         |            |            |          |            |
| NTnC   | TDVMGMDELYK  |         |           |         |            |            |          |            |
| NTnC2  | TDVMGMDELYK  |         |           |         |            |            |          |            |
| iNTnC2 | TDVMGMDELYK  |         |           |         |            |            |          |            |

**Figure S1.** Alignment of amino acid sequences for NTnC2, iNTnC2 and NTnC indicators. Amino acids internal to the  $\beta$ -can are marked by green color, amino acids of linkers are marked by yellow color, mutations in NTnC2 and iNTnC2 are highlighted by red color. Chromophore is marked by asterisks.

|                       |                                                                  |    |
|-----------------------|------------------------------------------------------------------|----|
| Acinonyx jubatus      | 1:SEEEIAECFRIFDRNADGYIDAEELAEIIFKASGEHVTDDEIESIMKDGDKNNDGRIDFDE  | 60 |
| Calypte anna          | 1:SEEEIANCFRIFDRNADGFIDAEELAEILRATGEQVTEEDIEDMMKDSDKNNNDGRIDFDE  | 60 |
| Crotalus adamanteus   | 1:SEEEIAECFRIFDRNADGFLDAEELVEIFRMSGGEAVSEEEIQEIMRDGDKNNNDGRIDFDE | 60 |
| Falco peregrinus      | 1:SEEEIANCFRIFDRNADGFIDIEELGEILRATGEHVTEEDIEDIMKDSDKNNNDGRIDFDE  | 60 |
| Harpegnathos saltator | 1:MQEELKEAFRMYDREGNGYITTATLKEILAAALDDKLTSSDLGIIAEIDTDGSGTVDFDE   | 60 |
| Myotis lucifugus      | 1:SEEEIAECFRIFDRNADGYIDAEELTEIFRASGEHVTEEEIESIMKDGDKNNDGRIDFDE   | 60 |
| Toadfish              | 1:SEEEISECFRIFDKDGNGFIDREEFGDIIRLTGEQLTDEDPDEIFGDSDDTKNGRIDFDE   | 60 |
| Acinonyx jubatus      | 61:FLKMMEGVQ                                                     | 69 |
| Calypte anna          | 61:FLKMMEGVQ                                                     | 69 |
| Crotalus adamanteus   | 61:FLKMMEGVQ                                                     | 69 |
| Falco peregrinus      | 61:FLKMMEGVQ                                                     | 69 |
| Harpegnathos saltator | 61:FMEEMTGE-                                                     | 68 |
| Myotis lucifugus      | 61:FLKMMEGVQ                                                     | 69 |
| Toadfish              | 61:FLKMVENVQ                                                     | 69 |

**Figure S2.** Alignment of truncated troponins C from fast animals. Identical amino acid residues are marked by red frames.



```

aNTnCcis_lib 1:MVSKGEEENMASLPATHELHIFGSINGIDFDMVGQGTGNPNPDGYEELNLKSTMGDLQFSP 60
cNTnCcis_lib 1:MVSKGEEENMASLPATHELHIFGSINGIDFDMVGQGTGNPNPDGYEELNLKSTMGDLQFSP 60
fNTnCcis_lib 1:MVSKGEEENMASLPATHELHIFGSINGIDFDMVGQGTGNPNPDGYEELNLKSTMGDLQFSP 60
*****

aNTnCcis_lib 61:WILVPHI GYG FHQYLPYPDGMSPFQAAMVDGSGYQVHRTMQFEDGASLTVNYRYTYEGSH 120
cNTnCcis_lib 61:WILVPHI GYG FHQYLPYPDGMSPFQAAMVDGSGYQVHRTMQFEDGASLTVNYRYTYEGSH 120
fNTnCcis_lib 61:WILVPHI GYG FHQYLPYPDGMSPFQAAMVDGSGYQVHRTMQFEDGASLTVNYRYTYEGSH 120
*****

aNTnCcis_lib 121:IKGEAQVEGTGFPADGLVMTNSLTAXXX SEEELAEFCRIFDRNADGYIDAEELAEIFKAS 180
cNTnCcis_lib 121:IKGEAQVEGTGFPADGLVMTNSLTAXXX SEEELANCFRIFDRNADGFIDAEELAEILRAT 180
fNTnCcis_lib 121:IKGEAQVEGTGFPADGLVMTNSLTAXXX SEEELANCFRIFDRNADGFIDIEELGEILRAT 180
*****.*****.***.***.***.***.

aNTnCcis_lib 181:GEHVTDDEIESLMKDG DKNNDGRID FDEFLKMMEGVQXXX ADWCVSKKTYPNDKTIVSTL 240
cNTnCcis_lib 181:GEQVTEEDIEDMMKDS DKNNDGRID FDEFLKMMEGVQXXX ADWCVSKKTYPNDKTIVSTL 240
fNTnCcis_lib 181:EEHVTEEDIEDLMKDS DKNNDGRID FDEFLKMMEGVQXXX ADWCVSKKTYPNDKTIVSTL 240
.***.***.***.***.*****

aNTnCcis_lib 241:KWAFITDNGKRYRSTARTTYYTFAKPM AANYLKNQPMYVFRKTELKHSKTELNFKEWQKAF 300
cNTnCcis_lib 241:KWAFITDNGKRYRSTARTTYYTFAKPM AANYLKNQPMYVFRKTELKHSKTELNFKEWQKAF 300
fNTnCcis_lib 241:KWAFITDNGKRYRSTARTTYYTFAKPM AANYLKNQPMYVFRKTELKHSKTELNFKEWQKAF 300
*****

aNTnCcis_lib 301:TDVMGMDELYK 311
cNTnCcis_lib 301:TDVMGMDELYK 311
fNTnCcis_lib 301:TDVMGMDELYK 311
*****

```

**Figure S4.** Alignment of amino acid sequences of GECIs libraries containing truncated troponins C from various fast animals and a derivative of the mNeonGreen fluorescent protein with a *cis*-chromophore. — *Peregrine falcon* falcon, a — *Acinonyx jubatus* cheetah, c — *Calypte anna* hummingbird. Amino acids forming the chromophore are shown in green, linker amino acids in yellow, and amino acids in contact with calcium ions in blue.









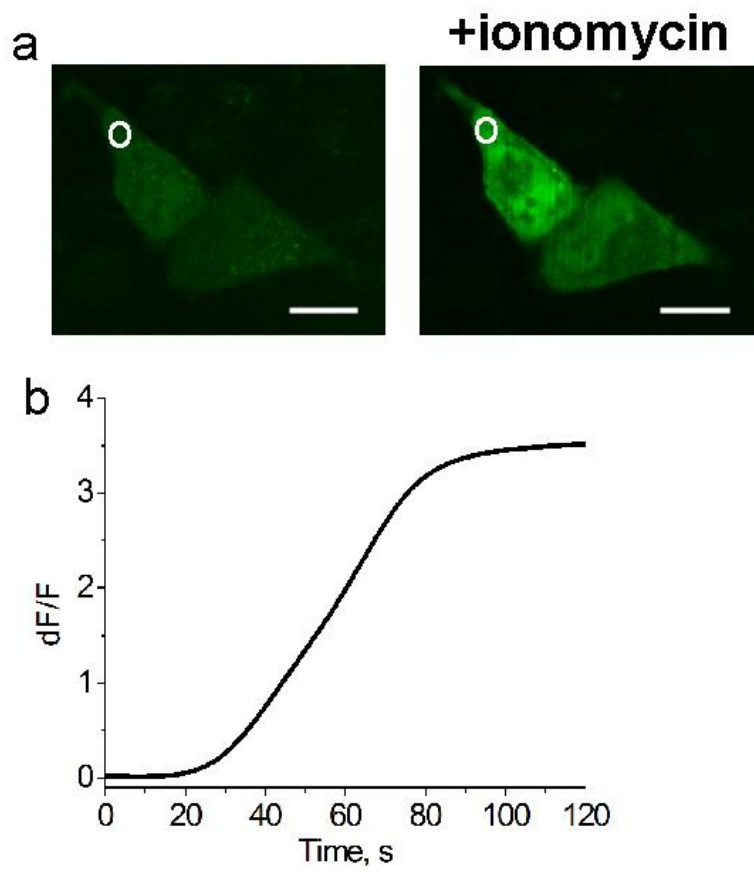

**Figure S8.** Response of fYTnC2 to ionomycin-induced increase of  $\text{Ca}^{2+}$  concentration in HeLa Kyoto cells. Top, confocal images of HeLa cells expressing fYTnC2 in green fluorescence channel (with 488 nm excitation) before and after ionomycin addition. Bottom, the graph shows the changes in green fluorescence as a result of the addition of 5  $\mu\text{M}$  ionomycin. The graph illustrates changes in green fluorescence in the areas indicated with white circles. Scale bars, 100  $\mu\text{m}$ .

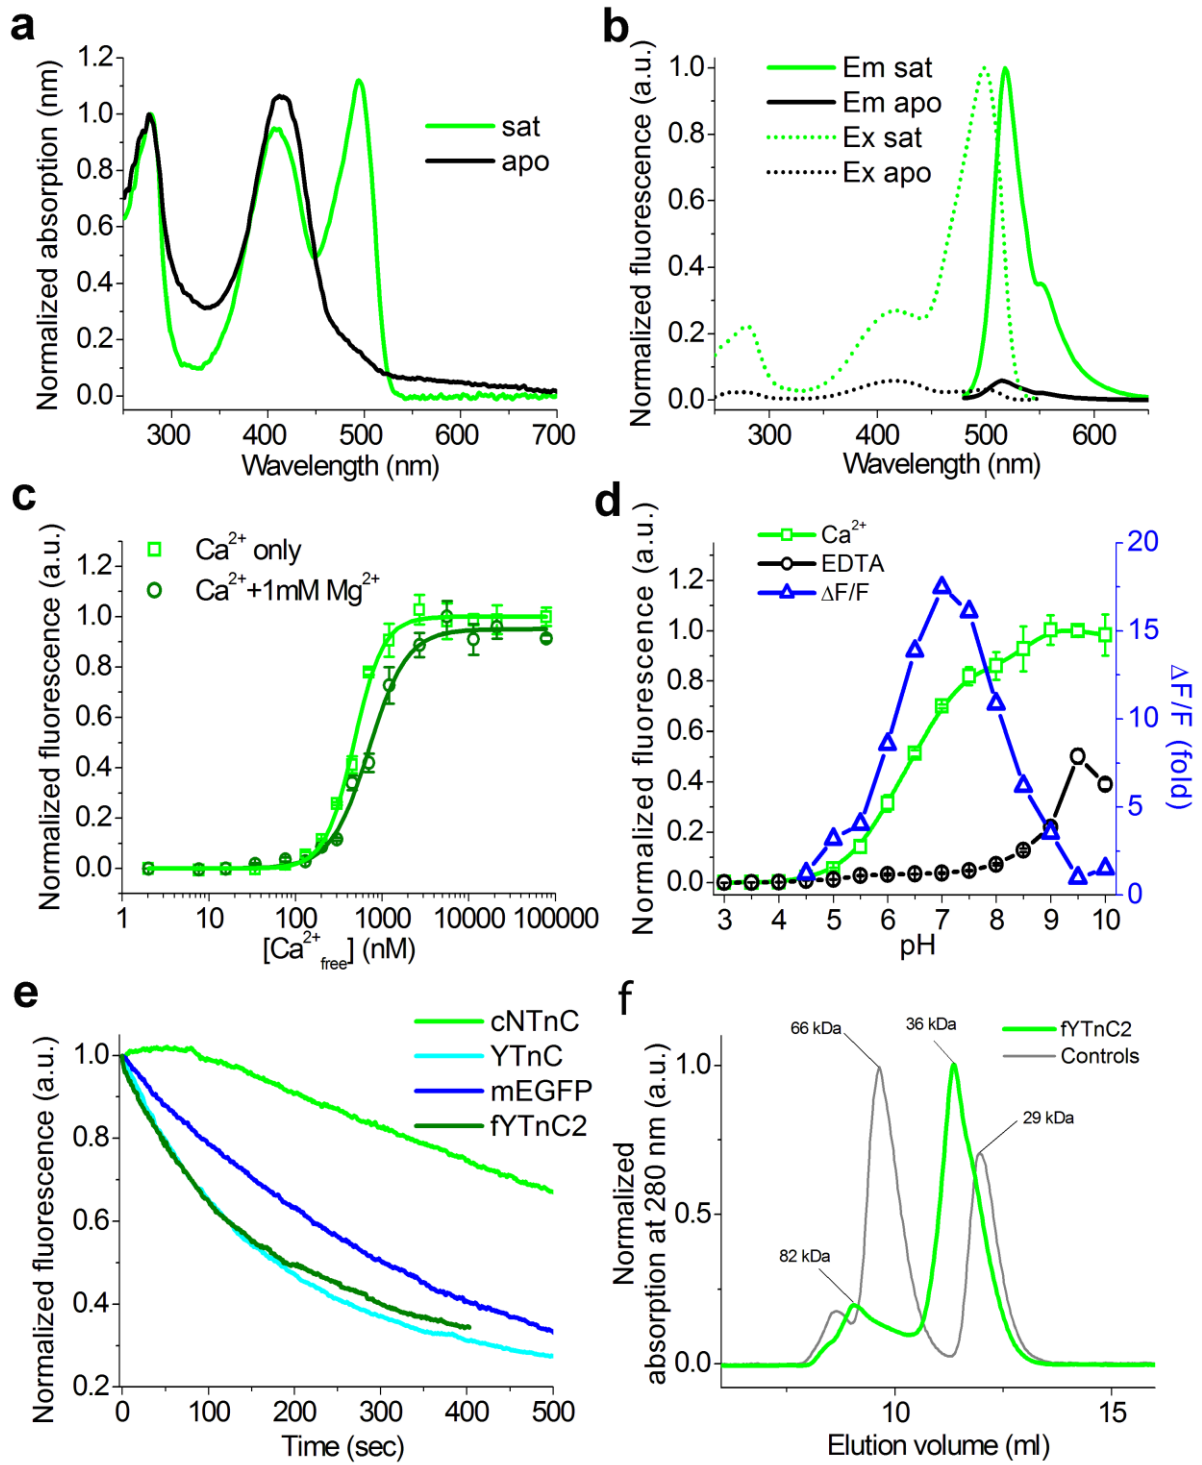

**Figure S9.** Properties fYTnC2 in vitro. (a) Absorbance spectra of fYTnC2 in  $Ca^{2+}$ -free (apo) and  $Ca^{2+}$ -bound (sat) states. (b) Excitation and emission spectra of fYTnC2 in  $Ca^{2+}$ -free and  $Ca^{2+}$ -bound states. (c)  $Ca^{2+}$  titration curves for fYTnC2 in the absence or presence of 1 mM  $MgCl_2$ . (d) Intensity and dynamic range of fYTnC2 as a function of pH. The  $dF/F$  fluorescence response (fold) at each pH value was determined as the ratio of fYTnC2 fluorescence intensity in the absence of  $Ca^{2+}$  to that in the presence of  $Ca^{2+}$ . (e) Photobleaching curves for fYTnC2, cNTnC and YTnC in the  $Ca^{2+}$ -bound states and for mEGFP. (f) Fast protein liquid chromatography of fYTnC2. fYTnC2 was eluted in 20 mM Tris-HCl (pH 7.80) and 200 mM NaCl buffer. The molecular weight of fYTnC2 was calculated from a linear regression of the dependence of the logarithm of the control molecular weights vs. elution volume (**Figure S7**). Error represents the standard error of the estimate for the average of three records.

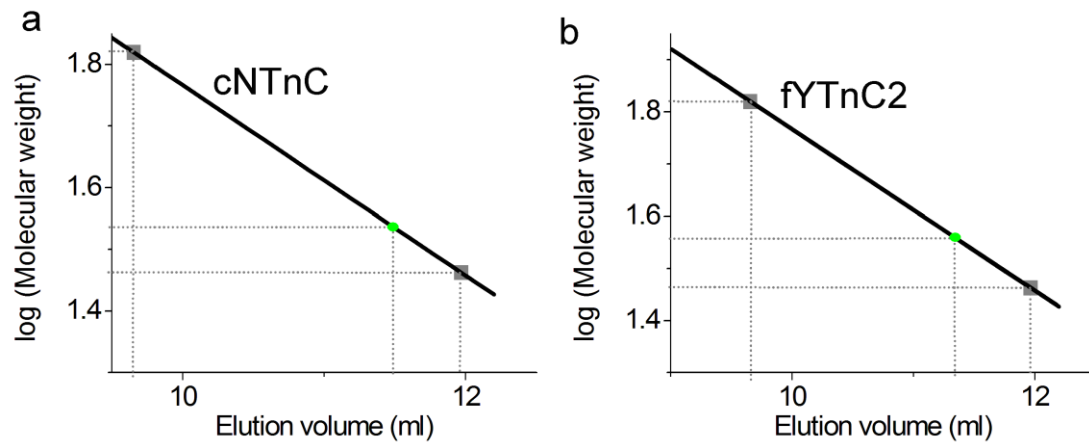

**Figure S10.** Fast protein liquid chromatography of cNTnC and fYTnC2 protein. cNTnC (a) and fYTnC2 (b) were eluted in 20 mM Tris-HCl (pH 7.80) and 200 mM NaCl buffer supplemented with 5 mM  $\text{CaCl}_2$  as shown in Figures 8f and S6f. The molecular weight of cNTnC and fYTnC2 were calculated from the dependence of logarithm of control molecular weights vs. elution volume.



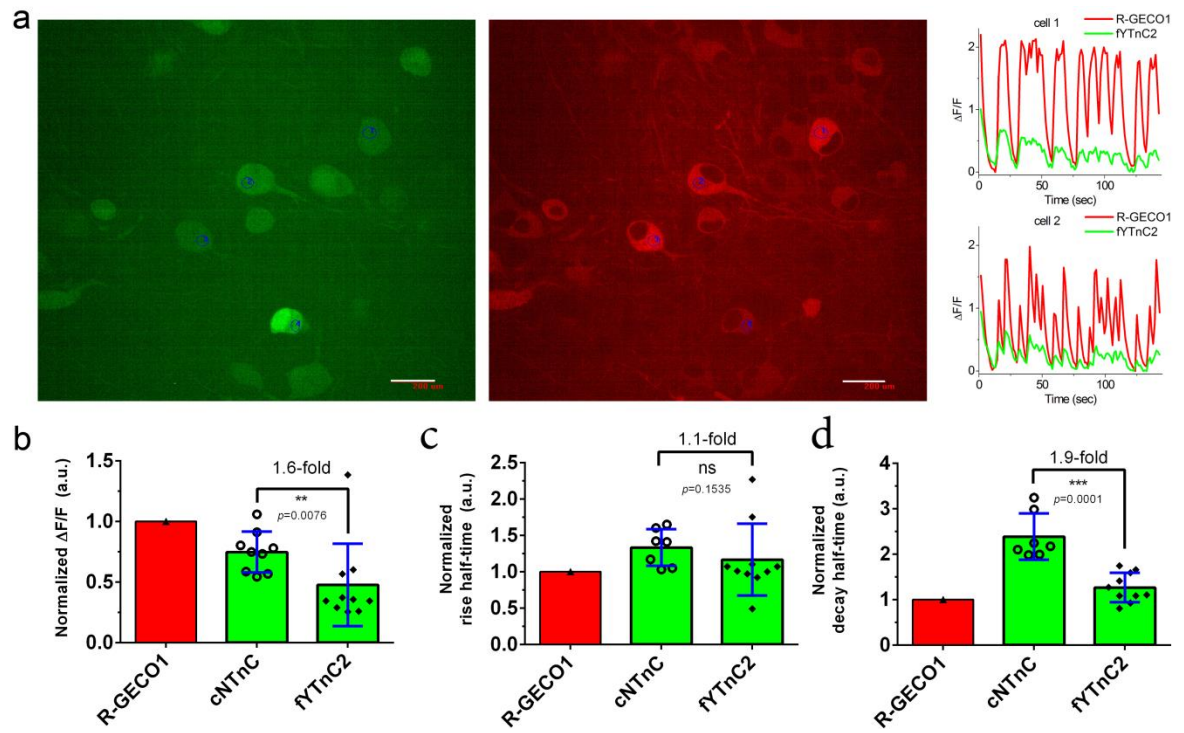

**Figure S11.** Spontaneous neuronal activity of fYTnC2 co-expressed with R-GECO1 in neuronal cultures. (a) Left, confocal images of green and red fluorescence with excitation at 488 and 561 nm of HeLa cells co-expressing fYTnC2 with R-GECO1. Scale bars, 50  $\mu$ m. Right, the graphs show the changes in green and red fluorescence in two cells in the areas indicated with blue circles. (b) The  $\Delta F/F$  responses for cNTnC and fYTnC2 were calculated according to the  $\Delta F/F$  response of R-GECO1 in the same cell. (c,d) The rise (c) and decay (d) half-times for cNTnC and fYTnC2. (b–d) Error bars are the standard deviations across 7–10 cells. Ns, not significant,  $p>0.05$ . \*\*,  $p$ -value is from 0.001 to 0.01. \*\*\*,  $p$ -value is from 0.0001 to 0.001.

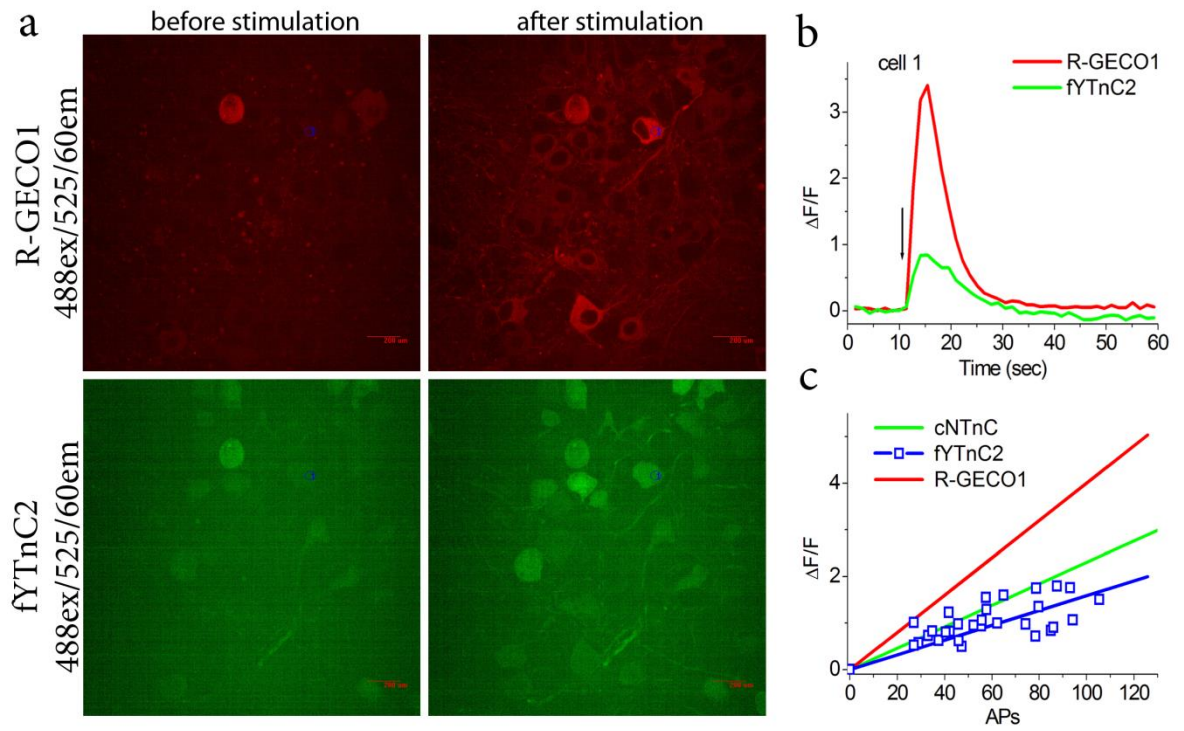

**Figure S12.** Comparison of the responses of green fYTnC2 and red R-GECO1 indicators to the external field stimulation of neurons co-expressing the GECIs in dissociated neuronal cultures. Neuronal cultures co-expressing the NES-fYTnC2 and NES-R-GECO1 indicators were imaged and stimulated on DIV 21–22th. Neuronal cultures were transduced on DIV fourth with a mixture of rAAVs carrying NES-fYTnC2 and NES-R-GECO1. (a) Confocal images of neuronal culture co-expressing the NES-cNTnC and NES-R-GECO1 indicators before (left) and after (right) electrical stimulation. Scale bar, 50  $\mu\text{m}$ . (b) The graph illustrates  $\Delta F/F$  changes in the green and red fluorescence of the fYTnC2 and R-GECO1 indicators in response to an electrical field stimulation. The changes on the graph correspond to the area indicated on panel a as a white circle. (c) The dependence of  $\Delta F/F$  responses for the fYTnC2 indicator vs. the number of action potentials (APs). A number of APs was determined according to the  $\Delta F/F$  response of the R-GECO1 indicator (0.04 per 1 AP) co-expressed in the same cell and assuming that response's linearity in the examined AP range (linear fitting for fYTnC2 had  $R^2$  value of 0.68211). The dependences of  $\Delta F/F$  responses on APs for cNTnC and R-GECO1 were added for comparison.



## **Supplementary Methods.**

### *Preparative protein purification.*

For preparative protein purification for X-ray crystallography, the bacterial cells expressing the NTnC protein with a His-tag and Tobacco Etch Virus (TEV) protease cleavage site were harvested by centrifugation for 20 min at 5,000×*rpm* and 4 °C using Avanti J-E centrifuge (Beckman Coulter, USA). The pellet was further resuspended in 40 mM Tris(tris(hydroxymethyl)aminomethane)-HCl buffer, pH 7.5 supplemented with 400 mM NaCl, 10 mM Imidazole, 0.2% Triton X-100, and 1 mM PMSF (phenylmethylsulfonyl fluoride) (7 ml per 1 g of the cells), and disrupted by sonication (2 sec pulse-6-sec pause, 45% amplitude, for total time of 5 minutes). The crude cell extract was centrifuged for 30 min at 28,000× *g* and 4 °C using Avanti J-E centrifuge (Beckman Coulter, USA). The supernatant was applied to a 5 ml Ni-NTA Superflow column (Qiagen, Hilden, Germany) equilibrated with the binding buffer (40 mM Tris-HCl, pH 7.5, containing 400 mM NaCl, 10 mM imidazole, and 0.1% (*v/v*) Triton X-100). The column was further washed using the same binding buffer without Triton X-100 followed by second washing using binding buffer in the absence of Triton X-100, supplemented with 40 mM imidazole. Protein elution was performed using the same binding buffer without Triton X-100 and supplemented with 300 mM imidazole. 1mM DTT (dithiothreitol) (final concentration) and 1mM EDTA (ethylenediaminetetraacetic acid) (final concentration) were added to the protein solution and mixed with TEV protease (1 mg per 10 mg of the protein). The final mix was dialyzed for 16 hours in dialysis buffer (40 mM Tris-HCl, pH 7.8, 400 mM NaCl, 5 mM Imidazole, 2 mM BME (2-mercaptoethanol), 1 mM EDTA), at +4 °C (monitoring of the His-tag cleavage was conducted using 12 % SDS-PAGE (sodium dodecyl sulphate–polyacrylamide gel electrophoresis)). After dialysis, the protein solution was applied to a Ni-NTA Superflow column (Qiagen, EU), equilibrated with dialysis buffer; TEV protease and cleaved His-tag were absorbed by the Ni-NTA Superflow column (Qiagen, EU) and the flow-through was concentrated till 2.3 ml volume using a 10 kDa cutoff centrifugal filter device (Millipore, Burlington, MA, USA). The buffer of the concentrated protein was exchanged for the 20 mM Tris pH 7.5, 5mM CaCl<sub>2</sub>, 5% (*v/v*) glycerol buffer using PD-10 column (GE Healthcare, Sweden). The concentrated protein was further applied to a 1 ml ResourceQ column (GE Healthcare, Sweden) equilibrated with the same 20 mM Tris pH 7.5, 5mM CaCl<sub>2</sub>, 5% (*v/v*) glycerol buffer. Recombinant NTnC was eluted using a linear gradient from 0 to 1M NaCl; protein eluted by one peak at 250 mM NaCl. Protein concentration was measured for each of the fractions individually using Bicinchoninic Acid Protein Assay Kit (Sigma-Aldrich, Saint Louis, USA), BSA (bovine serum albumin) protein standard (P0914-5AMP, Sigma-Aldrich, Saint Louis, USA) solution as standard. Total protein yield was 4.8 mg. The fractions were loaded onto the Superdex 75 10/300 GL column (GE Healthcare, Sweden), in 20 mM Tris-HCl pH 8.0, 5mM CaCl<sub>2</sub>, 250 mM NaCl buffer. In both cases, 15.4-17.5 ml fractions (corresponding to monomer) were collected and concentrated using a 10 kDa cutoff centrifugal filter device (Millipore, Burlington, MA, USA) till 15 mg/ml concentration for the crystallization. Protein purity at each step was monitored using 12% SDS-PAGE. Chromatography was performed using ÄKTA prime plus and ÄKTA explorer 100 systems (GE Healthcare, Sweden).

### *Mammalian cell imaging*

Transient transfection of the HeLa Kyoto cells was performed in 24-well format using lipofectamine reagent according to the manufacture's protocol. Cells were cultured using DMEM medium supplemented with 10% FBS, Glutamine, 50 U/ml penicillin, and 50 U/ml streptomycin, at 37 degrees and 5% CO<sub>2</sub>. HeLa cell cultures were imaged 24 h after the transient transfection using a laser spinning-disk

Andor XDi Technology Revolution multi-point confocal system (Andor Technology, UK) equipped with an inverted Nikon Eclipse Ti-E/B microscope (Nikon Instruments, Japan), a 75 W mercury-xenon lamp (Hamamatsu, Japan), a 60× oil immersion objective NA 1.4 (Nikon, Japan), a 16-bit Neo sCMOS camera (Andor Technology, UK), laser module Revolution 600 (Andor Technology, UK), spinning-disk module Yokogawa CSU-W1 (Andor Technology, UK). The green and red fluorescence were acquired using the 488 nm or 561 nm lasers, confocal dichroic mirror 405/488/561/640 and filter wheel, 525/50 or 617/73 emission filters, respectively. During imaging cells were incubated at 37 degrees and 5% CO<sub>2</sub> using a cage incubator (Okolab, Italy).

### *Imaging of neuronal cultures*

Dissociated neuronal cultures were isolated from the C57BL/6 mice at postnatal days 0–1 and were grown on a 24-well cell imaging black plate with a glass bottom; then, the tissue cultures were treated (Eppendorf, Hamburg, Germany) in Neurobasal Medium A (GIBCO, Paisley, Scotland, UK) supplemented with 2% B27 Supplement (GIBCO, Paisley, Scotland, UK), 0.5 mM glutamine (GIBCO, Paisley, Scotland, UK), 50 U/mL penicillin, and 50 g/mL streptomycin (GIBCO, Paisley, Scotland, UK). On the fourth day in vitro, neuronal cultures were transduced with a mixture of rAAV viral particles (DJ serotype) carrying AAV-CAG-NES-R-GECO1 and AAV-CAG-NES-cNTnC, AAV-CAG-NES-aNTnC, AAV-CAG-NES-fNTnC, AAV-CAG-NES-cYTnC, AAV-CAG-NES-aYTnC, or AAV-CAG-NES-fYTnC. The cells were imaged using an Andor XDi Technology Revolution multi-point confocal system on DIV 15 (spontaneous activity at 37°C, 5% carbon dioxide) and 21–22 (electrical field stimulation at r.t.).

Stimulation of neuronal cultures was performed using a self-built electrical system described earlier [1]. In this step, 300 voltage pulses of a 1 ms duration (0.5 ms negative phase, 0.5 ms interphase, and 0.5 ms positive phase) at a 87 Hz frequency with an amplitude of +70 V were applied to the neuronal cultures in 24-well plates through iridium electrodes with a 5 mm gap. Then, 10 μM cyanquinoxaline (6-cyano-7-nitroquinoxaline-2,3-dione) (CNQX) and 100 μM (2R)-amino-5-phosphonovaleric acid (APV or AP5) were added before stimulation to block spontaneous neuronal activity. To quantify the fluorescence intensity, the background noise determined from the adjacent cell-free area was subtracted from mean fluorescence intensity value for the cytosolic sub-region of the cell of the similar area. The rise and decay half-times were calculated as time difference between time point corresponding to the calcium spike maximum and time points at half-maximum on the left and right edges of the spike, respectively.

### **References**

1. Barykina, N. V.; Doronin, D. A.; Subach, O. M.; Sotskov, V. P.; Plusnin, V. V.; Ivleva, O. A.; Gruzdeva, A. M.; Kunitsyna, T. A.; Ivashkina, O. I.; Lazutkin, A. A.; Malyshev, A. Y.; Smirnov, I. V.; Varizhuk, A. M.; Pozmogova, G. E.; Piatkevich, K. D.; Anokhin, K. V.; Enikolopov, G.; Subach, F. V., NTnC-like genetically encoded calcium indicator with a positive and enhanced response and fast kinetics. *Sci Rep* **2018**, *8*, (1), 15233.
2. Tsien, R. Y., The green fluorescent protein. *Annu Rev Biochem* **1998**, *67*, 509-44.
